# Supplementary material for: Cellulose/silica composite microtubular superfoam with excellent flame retardancy, thermal insulation and ablative resistance
Source: Royal Society of Chemistry journal article supplement (doi:10.1039/d4ra00426d), 2024-01-01
Supplement: d4ra00426d1.pdf [file d4ra00426d1.pdf]

Supporting Information For

**Cellulose/Silica Composite Microtubular Superfoam with  
Excellent Flame Retardancy, Thermal Insulation and  
Ablative Resistance**

Ding Han<sup>1</sup> Xiankai Sun<sup>1\*</sup> Shichao Zhang<sup>1</sup> Linghao Wu<sup>1</sup> Bing Ai<sup>1</sup> Haoran Sun<sup>1</sup>

Yufeng Chen<sup>1</sup>

<sup>1</sup> China Building Materials Academy Co., Ltd, No.1 Guan Zhuang Dong Li, Chaoyang

District, Beijing, 100024, P. R. China

---

Xiankai Sun (✉)

E-mail: sunxiankai2008@163.com; Tel: +86 010-51167551

Ding Han: tjuhd@163.com, Shichao Zhang: zhangshichao@cbma.com.cn, Linghao

Wu: 16116339@bjtu.edu.cn, Bing Ai: aibing2018@163.com, Haoran Sun: moto398@126.com,

Yufeng Chen: chenyunfeng@tom.com

<sup>1</sup> China Building Materials Academy Co., Ltd., No.1 Guan Zhuang Dong Li, Chaoyang District,  
Beijing, 100024, P. R. China

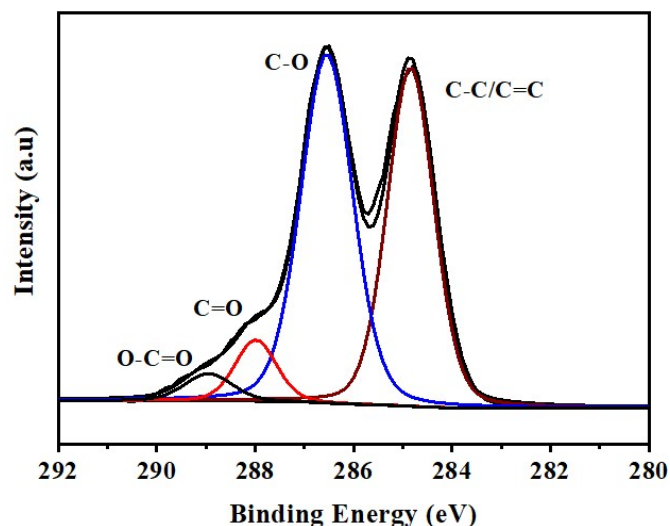

Fig. S1 High-resolution C 1s XPS spectrum of the poplar sawdust.

**Table S1** The pore structure parameters of the poplar sawdust and the delignified cellulose microtube.

| Sample                              | $S_{\text{BET}}(\text{m}^2 \text{g}^{-1})$ | $V_{\text{total}}(\text{cm}^3 \text{g}^{-1})$ | $D_{\text{average}}(\text{nm})$ |
|-------------------------------------|--------------------------------------------|-----------------------------------------------|---------------------------------|
| The poplar sawdust                  | 2.9                                        | 0.0040                                        | 9.8                             |
| the delignified cellulose microtube | 4.8                                        | 0.0083                                        | 8.1                             |

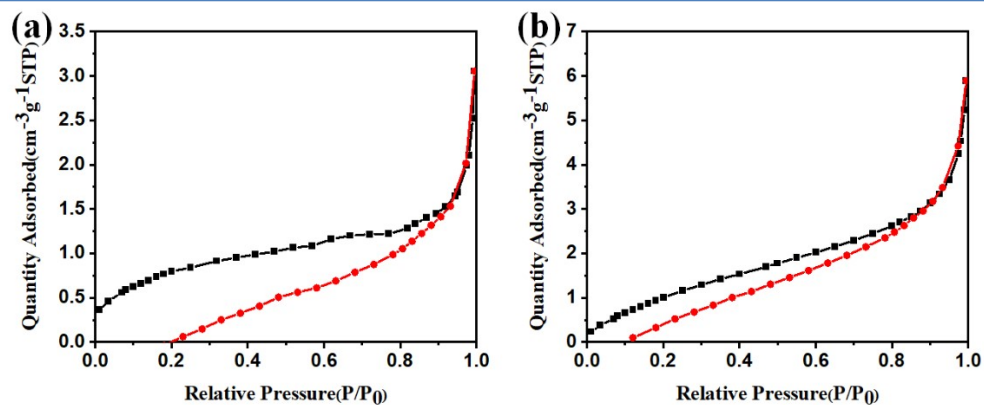

Fig. S2  $\text{N}_2$  adsorption-desorption isotherm of the poplar sawdust and the delignified cellulose microtube.

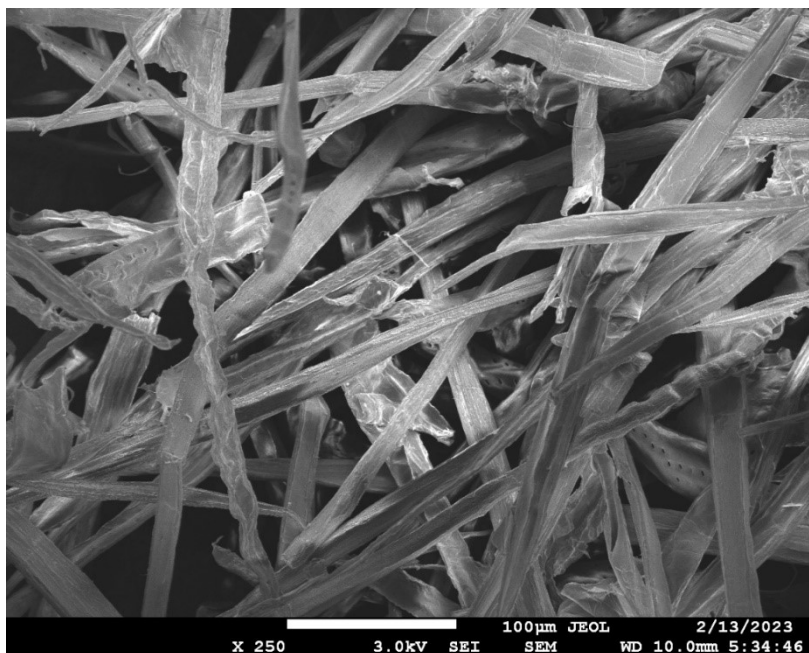

Fig. S3 SEM image of the delignified cellulose microtube

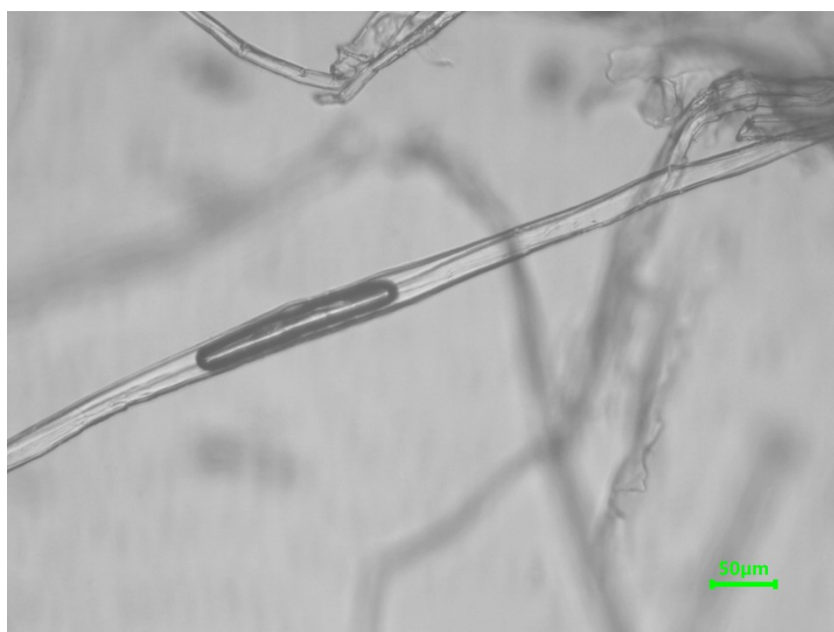

Fig. S4 Bubbles that appear transiently in cellulose microtubes after the precursor solution (1:5:4) is adsorbed by cellulose microtubes.

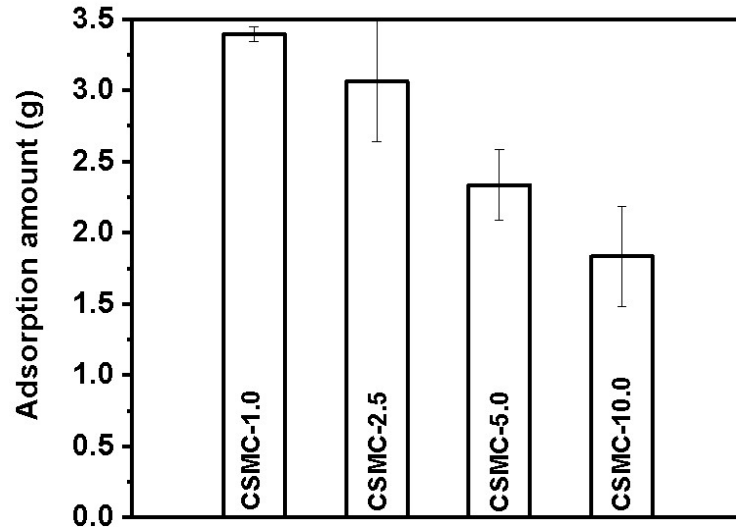

Fig. S5 The mass of the different  $\text{SiO}_2$  aerogel precursor solution adsorbed by cellulose microtubules (0.5 g).

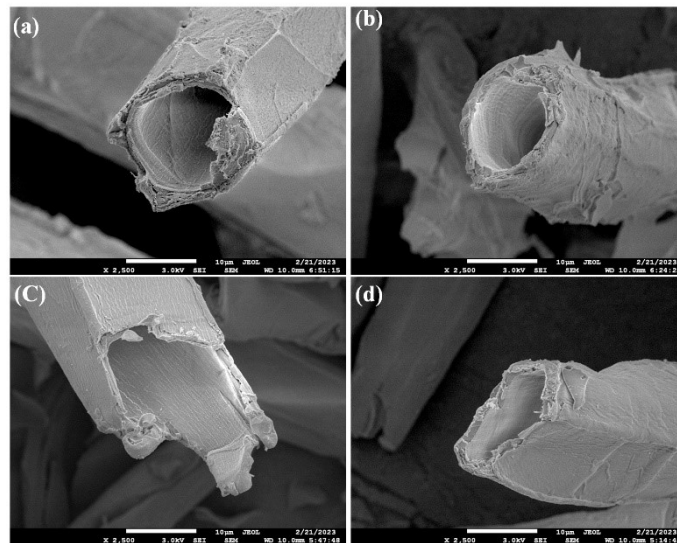

Fig. S6 SEM image of the CSMC-X super foam (a) CSMC-10.0, (b) CSMC-5.0, (c) CSMC-2.5, and (d) CSMC-1.0.

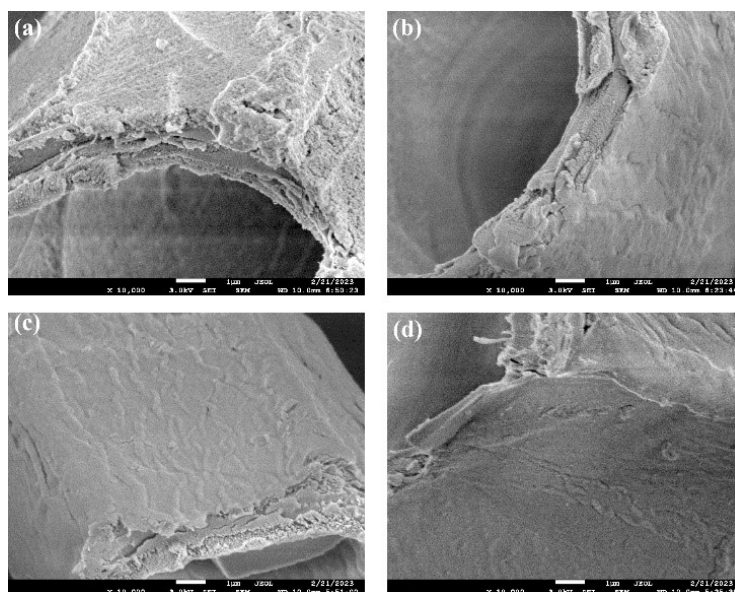

Fig. S7 SEM image of the CSMC-X super foam.

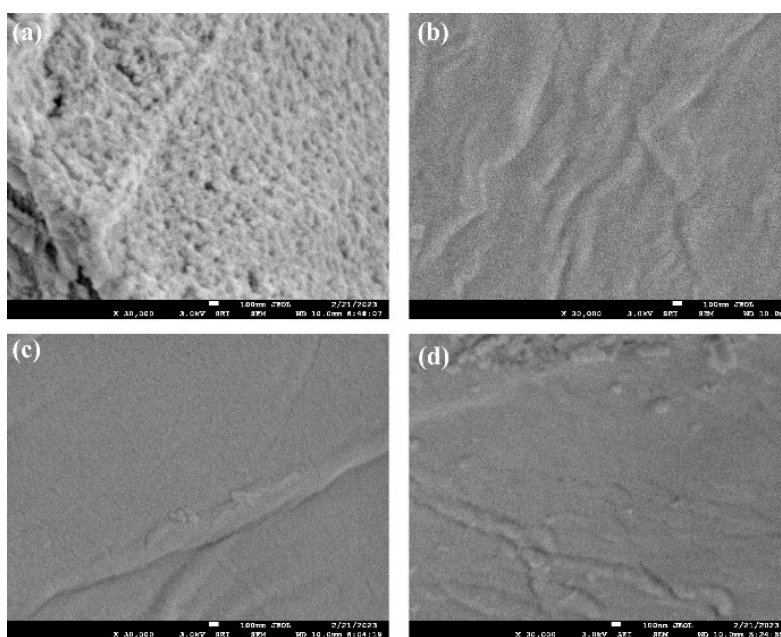

Fig. S8 SEM image of the CSMC-X super foam.

**Table S2** The pore structure parameters of the poplar sawdust and the delignified cellulose microtube.

| Sample    | $S_{\text{BET}}$ ( $\text{m}^2 \text{g}^{-1}$ ) | $V_{\text{total}}$ ( $\text{cm}^3 \text{g}^{-1}$ ) | $D_{\text{average}}$ (nm) |
|-----------|-------------------------------------------------|----------------------------------------------------|---------------------------|
| CSMC-1.0  | 159                                             | 0.1081                                             | 2.7                       |
| CSMC-2.5  | 120                                             | 0.1051                                             | 3.4                       |
| CSMC-5.0  | 57                                              | 0.0507                                             | 3.5                       |
| CSMC-10.0 | 7                                               | 0.0193                                             | 10.9                      |

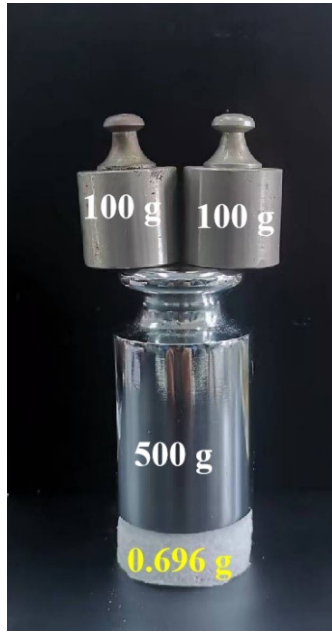

Fig. S9 The image of the CSMC-5.0 super foam could withstand 1005 times its own mass.

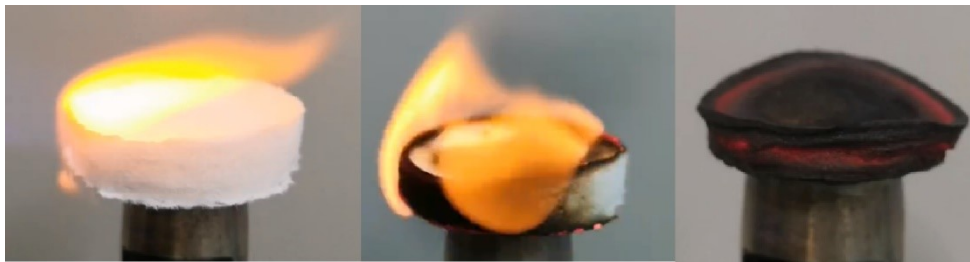

Fig. S10 Combustion behavior of the cellulose microtubule foam.

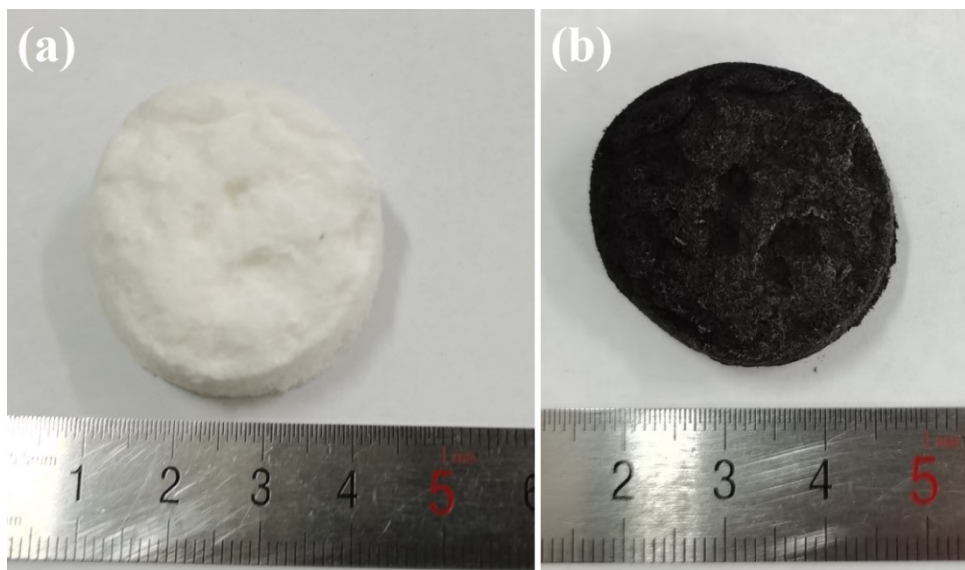

Fig. S11 The image of the CSMC-5.0 super foam before (a) and after (b) burning with

butane flame for 5 minutes.

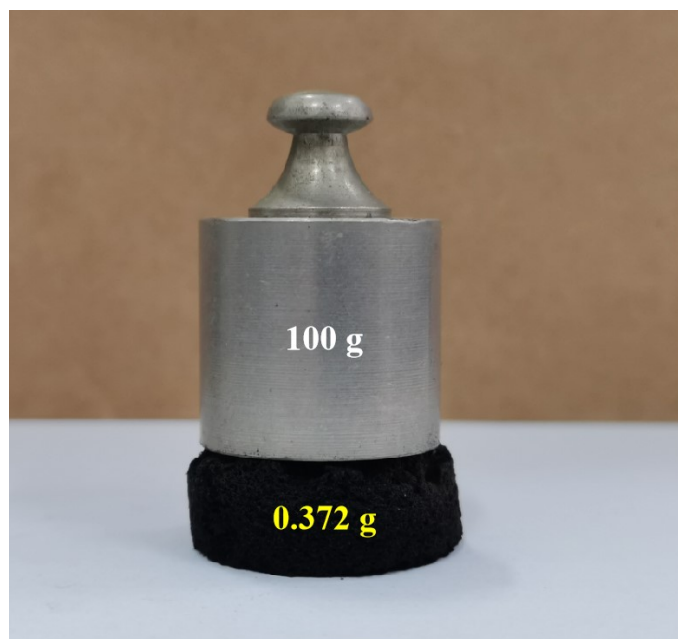

Fig. S12 The image of the B-CSMC-5.0 super foam could withstand about 269 times its own mass.

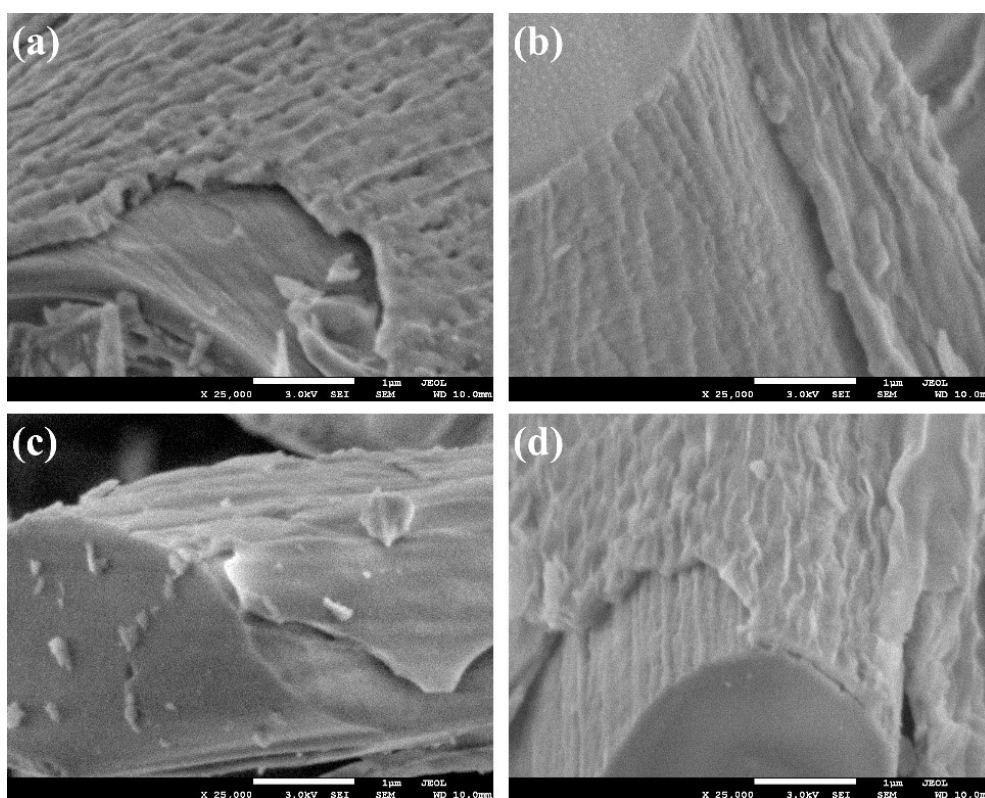

Fig. S13 SEM of the B-CSMC-10.0 (a), B-CSMC-5.0 (b), B-CSMC-2.5 (c), and B-CSMC-1.0 (d)

super foam after being rapidly burned by the butane blowtorch flame for about 5 min.

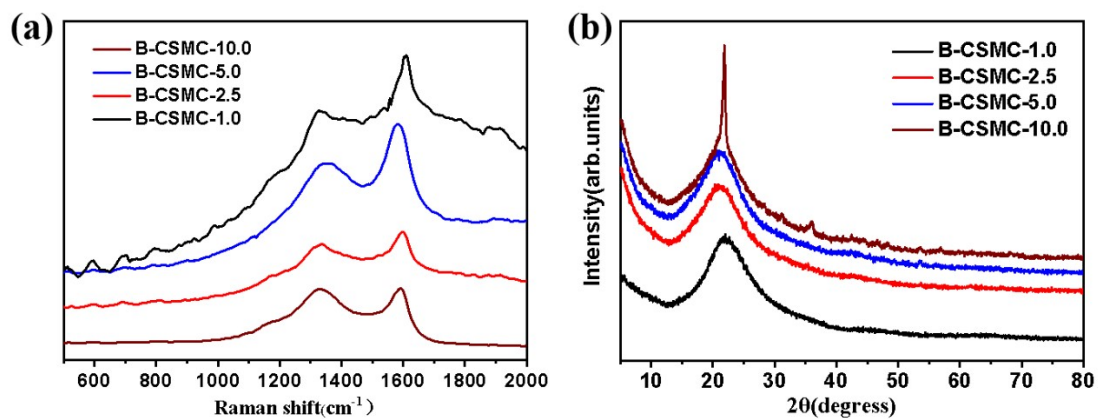

Fig. S14 Raman of the B-CSMC-X superfoam (a) and XRD of the B-CSMC-X superfoam (b).

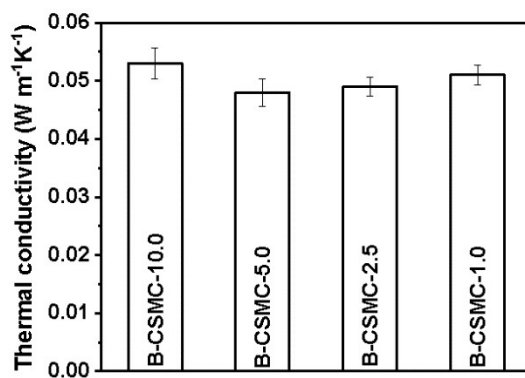

Fig. S15 The thermal conductivity of the B-CSMC-X superfoam.

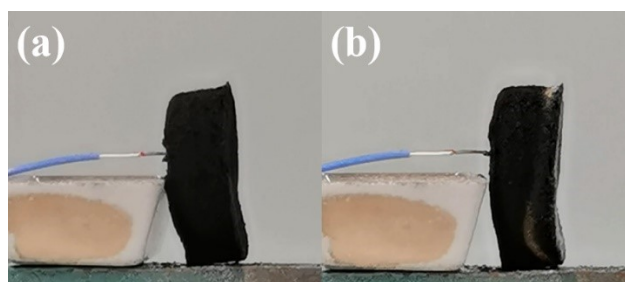

Fig. S16 Picture of the B-CSMC-5.0 superfoam before (a) and after (b) being burned by a butane flame for 3600 s.



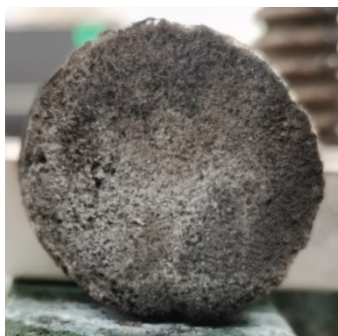

Fig. S17 Picture of the burning surface of the B-CSMC-X superfoam after being burned by a butane flame for 3600 s.
